# Supplementary material for: Medical Rehabilitation of Patients with Post-COVID-19 Syndrome—A Comparison of Aerobic Interval and Continuous Training
Source: MDPI journal article supplement (doi:10.3390/jcm12216739), 2023-10-25
Supplement: s1 [file s1]

# Supplementary Material

**Table S1.** Anthropometric and clinical data of CAD patients.

|                                | CAD<br>(n=96) |
|--------------------------------|---------------|
| <b>Anthropometric data</b>     |               |
| Age, years                     | 50.3 ± 6.6    |
| Sex, n (%)                     |               |
| female                         | 24 (25.0)     |
| male                           | 72 (75.0)     |
| Height, cm                     | 174.6 ± 8.5   |
| Weight, kg                     | 92.2 ± 17.3   |
| BMI, kg·m <sup>-2</sup>        | 30.1 ± 4.8    |
| <b>Clinical data</b>           |               |
| Coronary artery disease, n (%) | 96 (100)      |
| One vessel disease             | 43 (44.8)     |
| Two vessel disease             | 32 (33.3)     |
| Three vessel disease           | 21 (21.9)     |
| Myocardial infarction, n (%)   | 83 (86.5)     |
| STEMI                          | 52 (54.2)     |
| NSTEMI                         | 31 (32.3)     |

Only main diagnoses are listed. Data is presented as mean ± SD or n (%). BMI, Body Mass Index; STEMI, ST-Elevation Myocardial Infarction; NSTEMI, Non-ST-Elevation Myocardial Infarction.

**Table S2.** Changes in exercise capacity of CAD patients.

|                                                                        | CAD<br>(n=96)              |
|------------------------------------------------------------------------|----------------------------|
| <b>Ventilatory threshold 1 (VT1)</b>                                   |                            |
| Workload, W (% predicted)                                              |                            |
| T0                                                                     | 73.6 ± 25.9 (42.5 ± 13.7)  |
| T1                                                                     | 78.8 ± 28.0 (44.2 ± 13.7)  |
| Δ                                                                      | 3.8 ± 20.0 (2.1 ± 8.6)***  |
| VO <sub>2</sub> , ml·min <sup>-1</sup> ·kg <sup>-1</sup> (% predicted) |                            |
| T0                                                                     | 12.6 ± 2.8 (59.3 ± 21.0)   |
| T1                                                                     | 13.3 ± 2.9 (64.2 ± 24.6)   |
| Δ                                                                      | 0.7 ± 2.3 (4.6 ± 20.0)**   |
| <b>Peak exercise</b>                                                   |                            |
| Workload, W (% predicted)                                              |                            |
| T0                                                                     | 128.0 ± 41.9 (74.4 ± 21.3) |
| T1                                                                     | 137.6 ± 44.6 (79.4 ± 22.2) |
| Δ                                                                      | 9.5 ± 26.4 (5.0 ± 18.0)*** |
| VO <sub>2</sub> , ml·min <sup>-1</sup> ·kg <sup>-1</sup> (% predicted) |                            |
| T0                                                                     | 19.1 ± 4.4 (74.5 ± 15.7)   |
| T1                                                                     | 20.1 ± 4.6 (77.6 ± 16.4)   |
| Δ                                                                      | 1.0 ± 2.8 (3.2 ± 12.1)**   |

Data is presented as mean ± SD, at T0 (baseline), T1 (discharge) with respective changes (delta). Absolute values and percent of predicted values adjusted for sex, age and body surface area are provided. Within-group comparison was performed using paired two-sided t-test or Wilcoxon-Test based on absolute values. CAD, coronary artery disease patients. \*p<0.05, \*\*p<0.01, \*\*\*p<0.001.
